# Supplementary material for: Uncovering the Secrets of Prostate Cancer’s Radiotherapy Resistance: Advances in Mechanism Research
Source: MDPI journal article supplement (doi:10.3390/biomedicines11061628), 2023-06-03
Supplement: s1 [file s1]

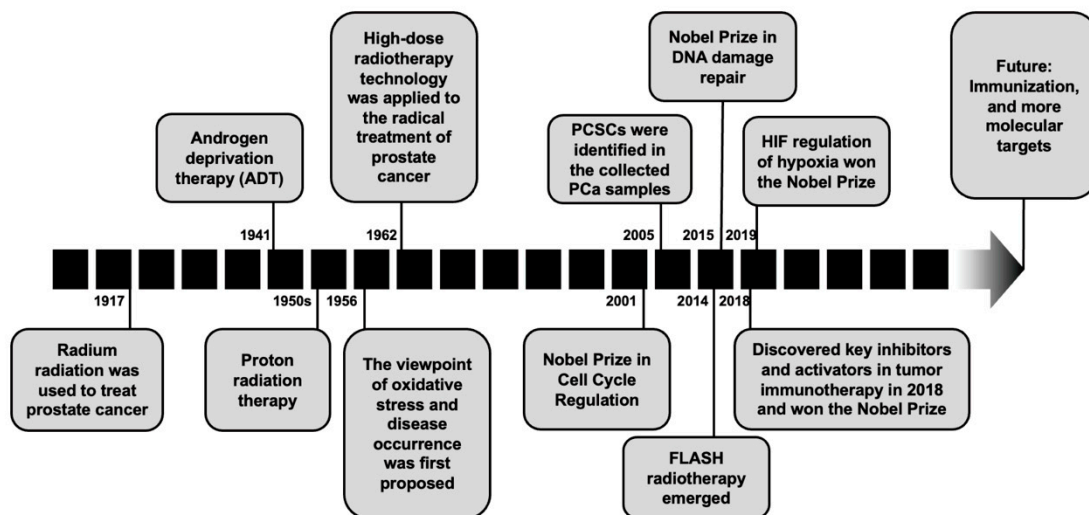

**Figure S1.** Timeline of important radiotherapy techniques and biological processes studied in radiotherapy resistance of prostate cancer.

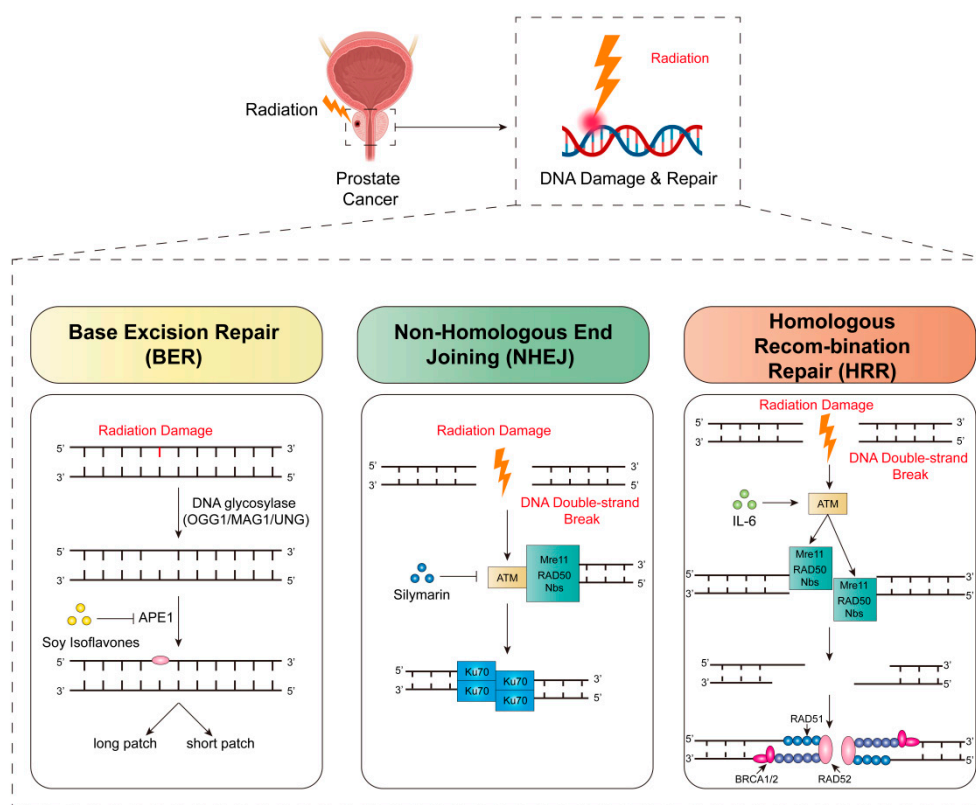

**Figure S2.** Targeted therapeutic agents and bio-activated compounds: unveiling their specific role links in the DNA damage and repair pathways.

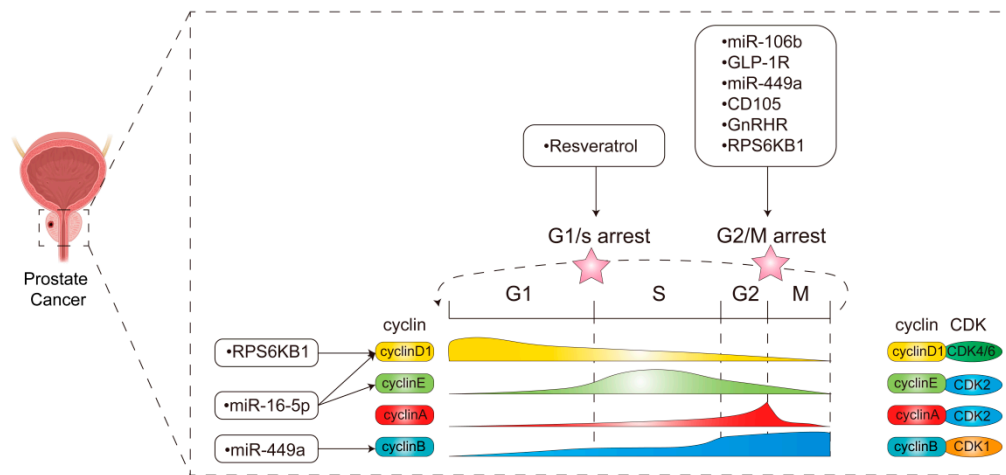

**Figure S3.** Targeted therapeutic agents and bio-activated compounds: unveiling their specific role links in the cell cycle.
